# Supplementary material for: Coeliac Disease in Elderly Patients: Value of Coeliac Lymphogram for Diagnosis
Source: MDPI journal article supplement (doi:10.3390/nu13092984), 2021-08-27
Supplement: s1 [file s1]

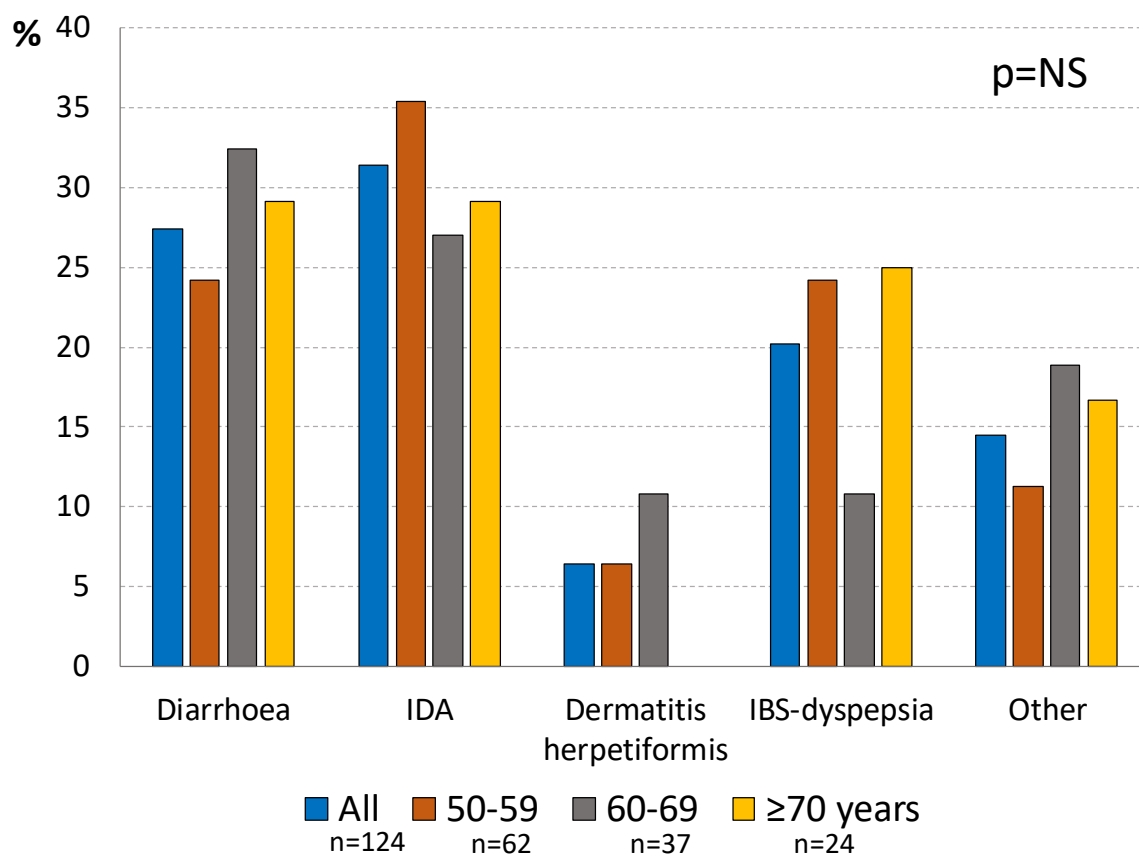

**Figure S1.** Clinical presentations that guide CD suspicion and diagnosis. IDA: iron-deficiency *anaemia*.
